# Supplementary material
Source: PubMed Central journal article supplement (PMC3392623)

Figure S1

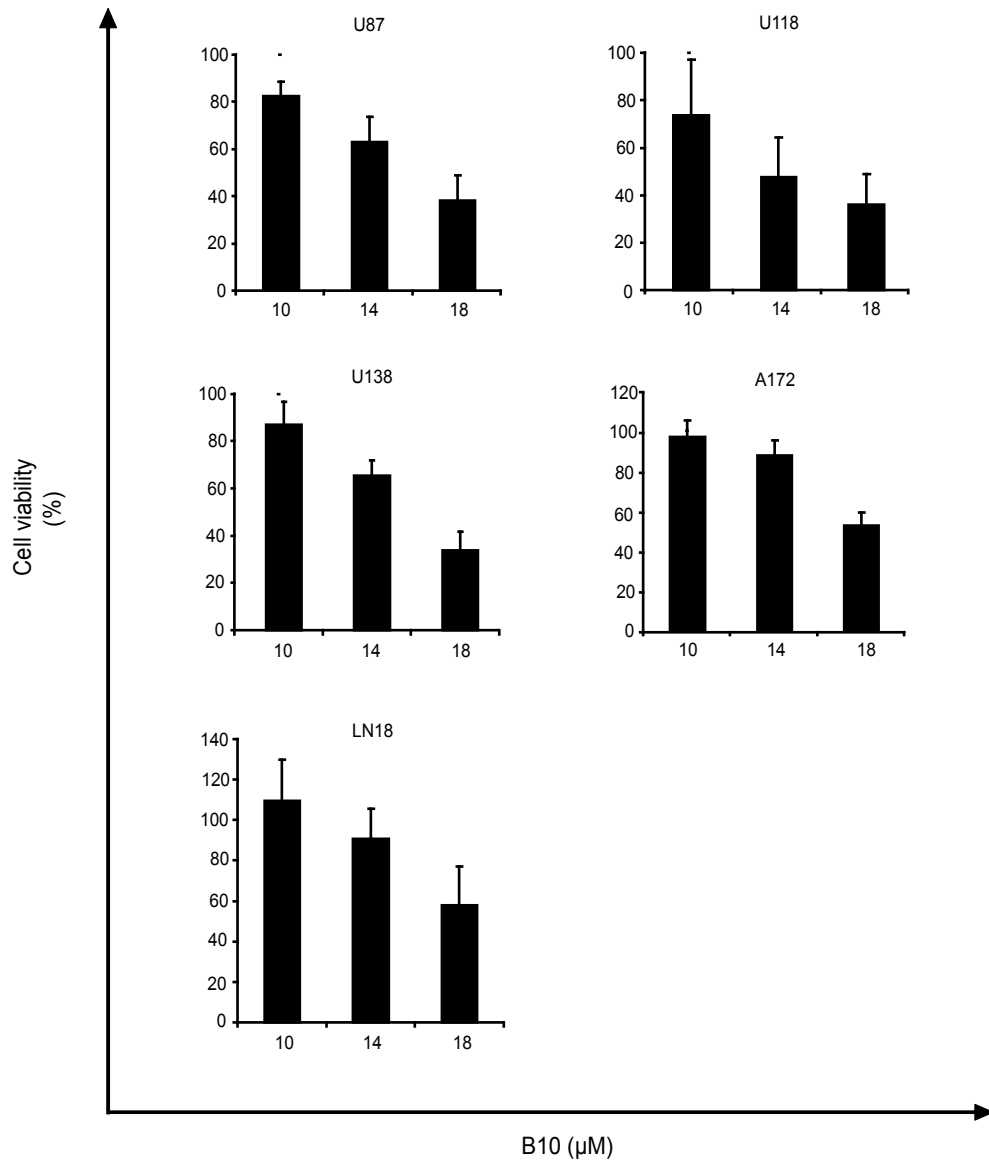

Figure S2

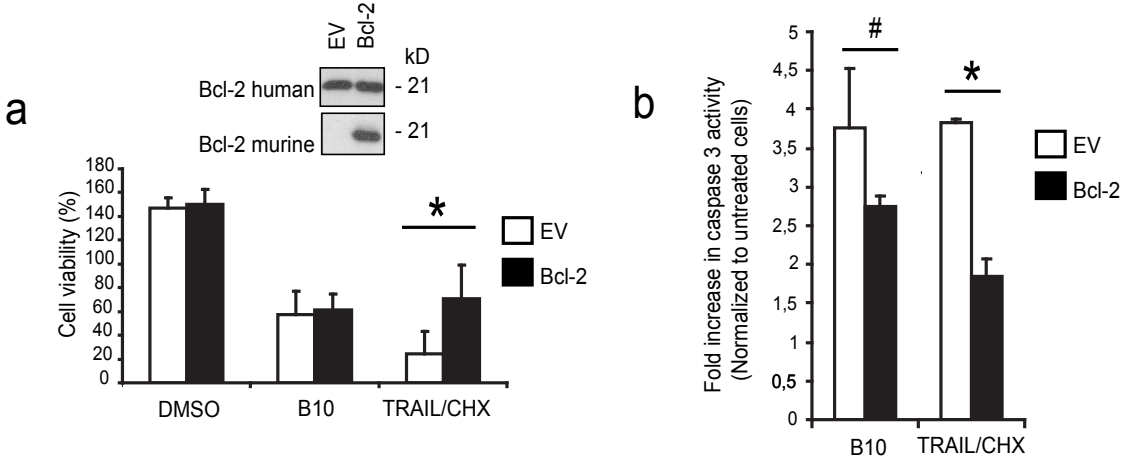

Figure S3

**A**

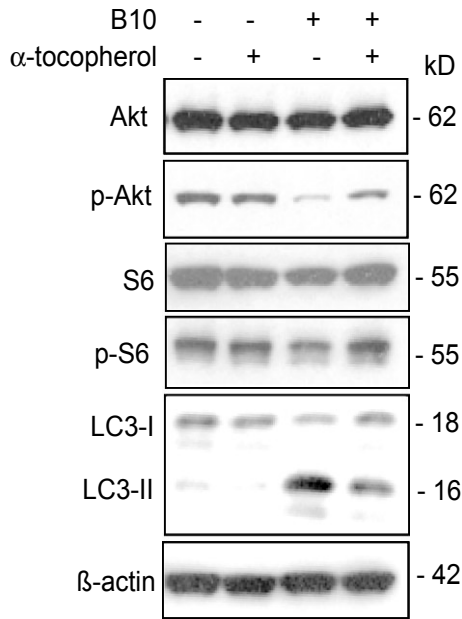

**B**

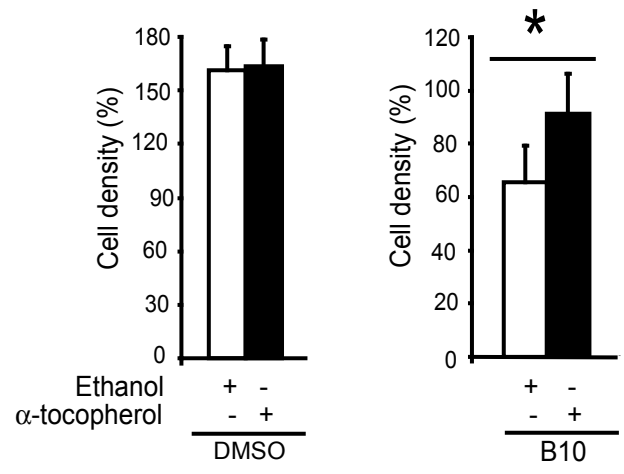

**C**

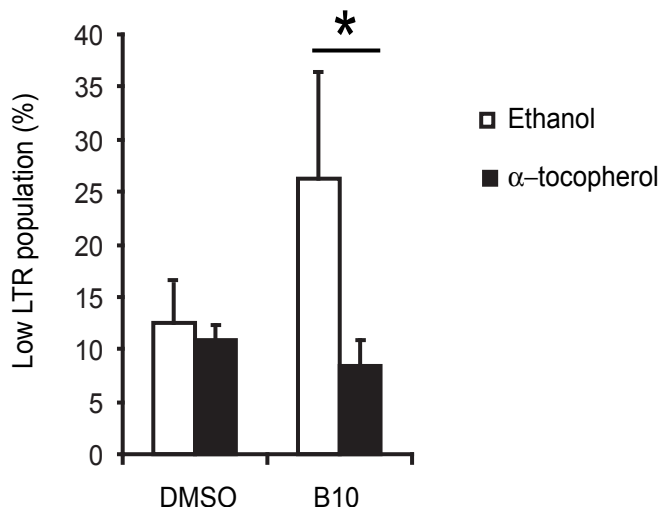

Figure S4

A

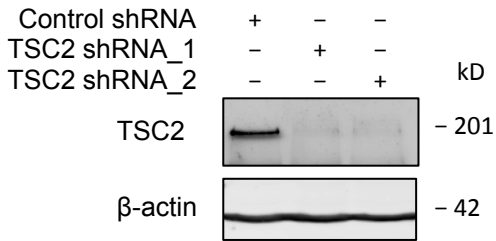

B

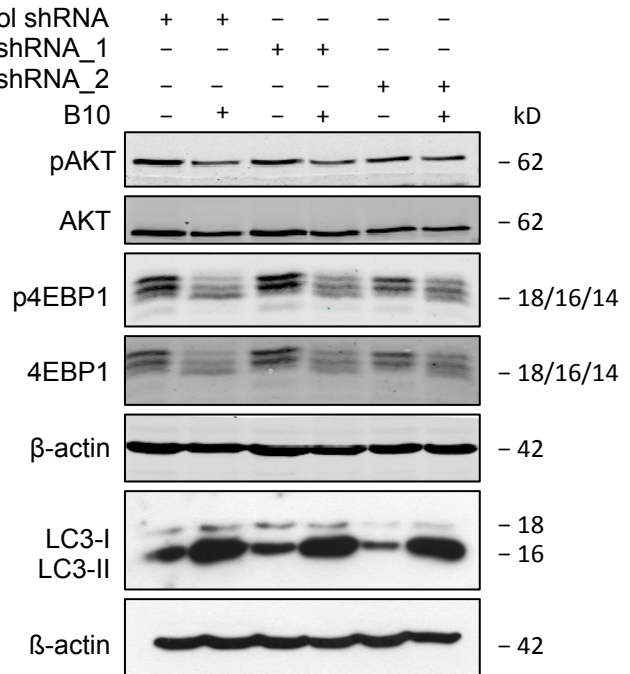

C

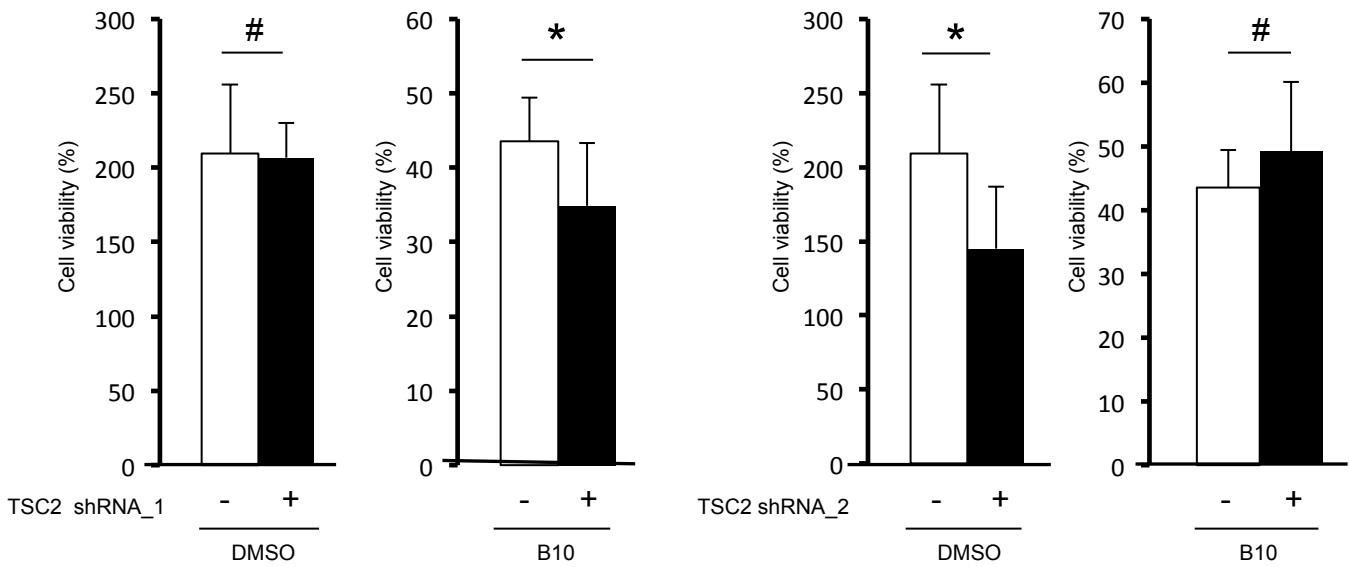

Figure S5

A

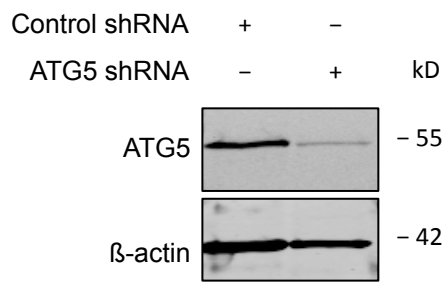

B

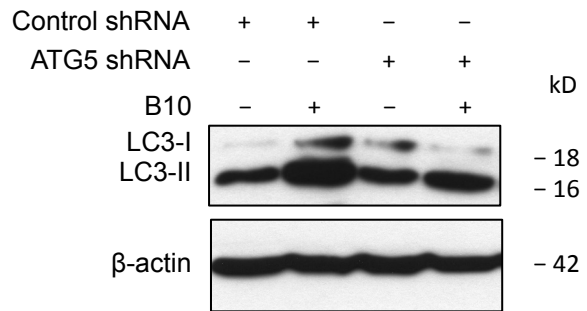

C

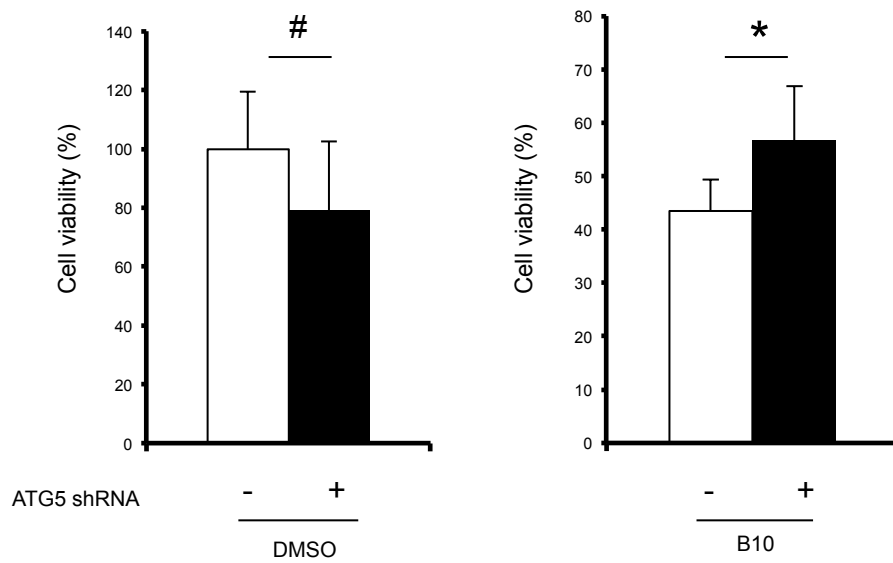

Figure S6

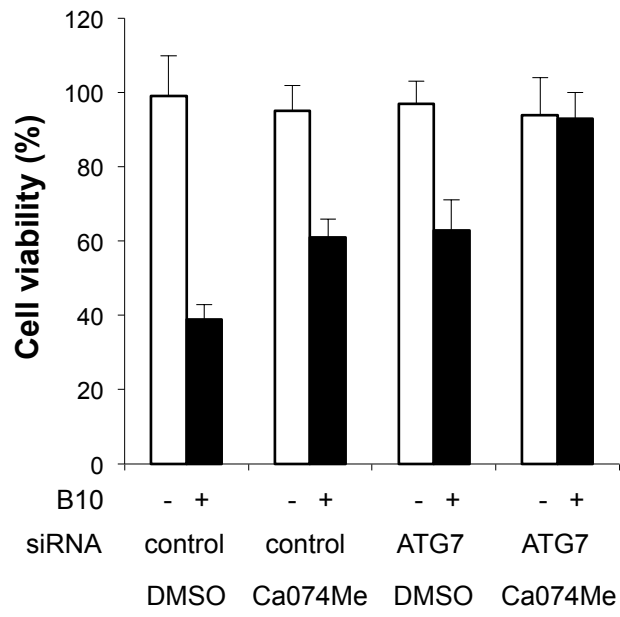

Supplement: cdd201210x1.pdf [file cdd201210x1.pdf]
